# Supplementary material
Source: ML conference proceedings conference paper supplement (https://openreview.net/forum?id=KOUAayk5Kx)
Supplement: supplementary_material [file attachment]

# OVERCOMING MUTI-MODEL FORGETTING IN ONE-SHOT NEURAL ARCHITECTURE SEARCH VIA ORTHOGONAL GRADIENT LEARNING

**Anonymous authors**

Paper under double-blind review

## 1 SUPPLEMENTARY FILE.

### 1.1 A PROOF OF Lemma 2

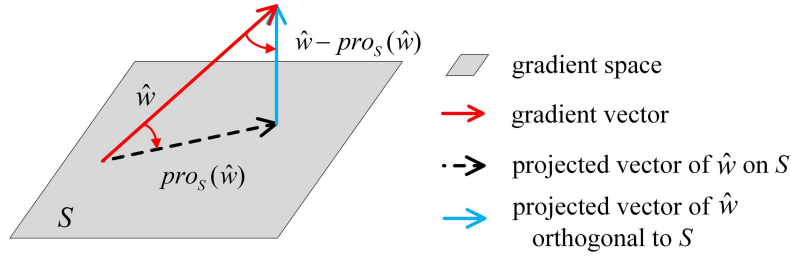

Figure 1: An illustration of the relationship between the input space  $S$  and the orthogonal projector  $P$ , where  $f = b - c$ .

**Lemma 2.** Given a gradient space  $S_r^{(i,j)}$  consists of a number of gradient vectors, i.e.,  $S_r^{(i,j)} = \{g_1, g_2, \dots, g_n\}$ , the projection of  $\Delta w_{l,r}^{(i,j)}(k+1)^{BP}$  on  $S_r^{(i,j)}$  can be calculated by Eq. 1.

$$\begin{aligned} \text{pro}_{S_r^{(i,j)}}(\Delta w_{l,r}^{(i,j)}(k+1)^{BP}) = \\ G(G^T G)^{-1} G^T \Delta w_{l,r}^{(i,j)}(k+1)^{BP}, \end{aligned} \quad (1)$$

where  $G = [g_1, g_2, \dots, g_n]$ ,  $g_i \in \mathbb{R}^{h \times 1}$ ,  $i = 1, 2, \dots, n$ .  $n$  and  $h$  are the number of gradient vectors and the dimension of the gradient space  $S_r^{(i,j)}$ , respectively.

**Proof.** We use  $\hat{w}$  to represent  $\Delta w_{l,r}^{(i,j)}(k+1)^{BP}$  and use  $S$  to represent the gradient space  $S_r^{(i,j)}$  for simplicity. We take Figure 1 to illustrate the relationship between  $\hat{w}$  and  $S$ . In the figure,  $\hat{w}$  is a gradient vector, while  $\text{pro}_S(\hat{w})$  is the gradient  $\hat{w}$  projected on  $S$ .

*Step 1:* we express  $\text{pro}_S(\hat{w})$  by a linear combination of the gradient vectors from  $S$ :

$$\text{pro}_S(\hat{w}) = x_1 g_1 + x_2 g_2 + \dots + x_n g_n = GX, \quad (2)$$

where  $G$  is a matrix of gradient vectors from  $S$ , i.e.,  $G = [g_1, g_2, \dots, g_n]^T$ .  $X$  is a vector of constants, denoted by  $X = [x_1, x_2, \dots, x_n]^T$ .

*Step 2:* In order to get  $X$ , we find that  $\hat{w} - \text{pro}_S(\hat{w})$  is orthogonal to  $S$ . In other words,  $\hat{w} - \text{pro}_S(\hat{w})$  is orthogonal to any input vector from  $S$ . Namely, the inner product of  $\hat{w} - \text{pro}_S(\hat{w})$  and  $g_i$  is zero, where  $i = 1, \dots, n$ .

$$\begin{cases} \langle g_1, \hat{w} - \text{pro}_S(\hat{w}) \rangle = g_1^T \cdot (\hat{w} - GX) = 0 \\ \dots \\ \langle g_n, \hat{w} - \text{pro}_S(\hat{w}) \rangle = g_n^T \cdot (\hat{w} - GX) = 0 \end{cases} \quad (3)$$

And we can reform the Eq. 3 by matrix calculations as follows:

$$G^T (\hat{w} - GX) = 0. \quad (4)$$

*Step 3:* On the basis of *Step 2*, we can get the vector  $X$  as follows:

$$X = (G^T G)^{-1} G^T \hat{w}. \quad (5)$$

*Step 4:* We integrate Eq. 5 into Eq. 2 to get  $pros(\hat{w})$  using

$$pros(\hat{w}) = GX = G(G^T G)^{-1} G^T \hat{w}. \quad (6)$$

Thus the *Lemma 2* is proven.

## 1.2 CONVERGENCE GUARANTEE OF OGL

**Theorem 1.** Given a  $l$ -smooth and convex loss function  $L(w)$ ,  $w^*$  and  $w_0$  are the optimal and initial weights of  $L(w)$ , respectively. If we let  $\eta = 1/l$ , then we have:

$$L(w_t) - L(w^*) \leq \frac{2l}{t} \|w_0 - w^*\|_F^2, \quad (7)$$

where  $w_t$  is the weights after  $t$ -th training.

Theorem 1 demonstrates that our proposed method OGL has a convergence rate of  $O(1/t)$  Niu et al. (2021).

**Proof.** Based on projected gradient descent (PGD) Nesterov (2003), the update of  $w$  can be represented as follows:

$$q(w_t) = \arg \min_{w \in Q} (L(w_t) + \langle L'(w_t), w - w_t \rangle + \frac{\beta}{2} \|w_t - w\|_F^2) \quad (8)$$

$$w_{t+1} = w_t - \eta \beta (w_t - q(w_t)), \quad (9)$$

where  $\eta$  and  $\beta$  are two hyperparameters.

Let  $Q$  is a closed convex set,  $w^+ \in Q$  and  $\beta \geq l$ . We denote  $Q_w = q(w^+)$  and  $g_Q = g_Q(w^+) = \beta(w^+ - q(w^+))$ , then we let:

$$\phi(w) = L(w^+) + \langle L'(w^+), w - w^+ \rangle + \frac{\beta}{2} \|w - w^+\|_F^2. \quad (10)$$

Based on Eq. 10, we have  $\phi'(w) = L'(w^+) + \beta(w - w^+)$ , Then we have:

$$\phi'(Q_w) = L'(w^+) + \beta(Q_w - w^+) = L'(w^+) - g_Q. \quad (11)$$

and

$$\langle L'(w^+) - g_Q, w - Q_w \rangle = \langle L'(w^+), w - Q_w \rangle - \langle g_Q, w - Q_w \rangle = \langle \phi'(Q_w), w - Q_w \rangle \geq 0. \quad (12)$$

Based on Eq. 10, Eq. 11 and Eq. 12 and the property of convex function, we have:

$$\begin{aligned}
L(w) &\geq L(w^+) + \langle L'(w^+), w - w^+ \rangle \\
&= L(w^+) + \langle L'(w^+), w - Q_w \rangle + \langle L'(w^+), Q_w - w^+ \rangle \\
&\geq L(w^+) + \langle L'(w^+), Q_w - w^+ \rangle + \langle g_Q, w - Q_w \rangle \\
&= \phi(Q_w) - \frac{\beta}{2} \|Q_w - w^+\|_F^2 + \langle g_Q, w - Q_w \rangle \\
&= \phi(Q_w) - \frac{1}{2\beta} \|g_Q\|_F^2 + \langle g_Q, w - Q_w \rangle \\
&= \phi(Q_w) - \frac{1}{2\beta} \|g_Q\|_F^2 + \langle g_Q, w - w^+ \rangle + \langle g_Q, \frac{1}{\beta} g_Q \rangle \\
&= \phi(Q_w) + \frac{1}{2\beta} \|g_Q\|_F^2 + \langle g_Q, w - w^+ \rangle.
\end{aligned} \tag{13}$$

And  $\phi(Q_w) \geq L(Q_w)$  since  $\beta \geq l$ , Eq. 13 can be formulated as:

$$L(w) \geq \phi(Q_w) + \frac{1}{2\beta} \|g_Q\|_F^2 + \langle g_Q, w - w^+ \rangle \geq L(Q_w) + \frac{1}{2\beta} \|g_Q\|_F^2 + \langle g_Q, w - w^+ \rangle. \tag{14}$$

Based on Eq. 14, we let  $\beta = l$ ,  $w = w^+ = w_t$  and  $L(q(w_t)) \geq L(q(w_{t+1}))$ , then we have  $\langle g_Q, w - w^+ \rangle = 0$  and:

$$L(w_t) \geq L(w_{t+1}) + \frac{1}{2l} \|g_Q(w_t)\|_F^2, \tag{15}$$

where  $g_Q(w_t) = \beta(w_t - q(w_t))$ .

Also, based on Eq. 14, we let  $\beta = l$ ,  $w = w^*$ ,  $w^+ = w_t$  and  $L(q(w_t)) \geq L(w^*)$ , then we have:

$$L(w^*) \geq L(w_t) + \frac{1}{2l} \|g_Q(w_t)\|_F^2 - \langle g_Q(w_t), w^* - w_t \rangle. \tag{16}$$

We denote  $r_t = \|w_t - w^*\|_F$  and  $g_{Q,t} = g_Q(w_t)$ , then based on Eq.16, we have:

$$\begin{aligned}
r_{t+1}^2 &= \|w_{t+1} - w^*\|_F^2 \\
&= \|w_t - w^* - \eta g_{Q,t}\|_F^2 \\
&= r_t^2 - 2\eta \langle g_{Q,t}, w_t - w^* \rangle + \eta^2 \|g_{Q,t}\|_F^2 \\
&\leq r_t^2 - \frac{\eta}{\beta} \|g_{Q,t}\|_F^2 + \eta^2 \|g_{Q,t}\|_F^2 \\
&= r_t^2 + \eta(\eta - \frac{1}{\beta}) \|g_{Q,t}\|_F^2.
\end{aligned} \tag{17}$$

And based on Eq. 17 and if  $\eta \leq 1/\beta$ , then we have:

$$r_{t+1}^2 \leq r_t^2 \leq r_{t-1}^2 \leq \dots \leq r_0^2. \tag{18}$$

We denote  $\Delta_t = L(w_t) - L(w^*)$  and based on Eq. 18, then we have:

$$\Delta_t \leq \langle g_{Q,t}, w_t - w^* \rangle \leq r_0 \|g_{Q,t}\|_F. \tag{19}$$

Based on Eq. 15 and Eq. 19, we have:

$$\begin{aligned}
\Delta_{t+1} &= L(w_{t+1}) - L(w^*) \\
&\leq L(w_t) - L(w^*) - \frac{1}{2l} \|g_{Q,t}\|_F^2 \\
&= \Delta_t - \frac{1}{2l} \|g_{Q,t}\|_F^2 \\
&\leq \Delta_t - \frac{1}{2l} \frac{\Delta_t^2}{r_0^2}.
\end{aligned} \tag{20}$$

Based on Eq. 20, we have:

$$\frac{1}{\Delta_t} \leq \frac{1}{\Delta_{t+1}} - \frac{1}{2l} \frac{1}{r_0^2} \frac{\Delta_t}{\Delta_{t+1}}. \tag{21}$$

Based on Eq.21 combined with  $\Delta_{t+1} \leq \Delta_t$ , we have:

$$\frac{1}{\Delta_{t+1}} \geq \frac{1}{\Delta_t} + \frac{1}{2l} \frac{1}{r_0^2} \frac{\Delta_t}{\Delta_{t+1}} \geq \frac{1}{\Delta_t} + \frac{1}{2l} \frac{1}{r_0^2} \geq \dots \geq \frac{1}{\Delta_0} + \frac{1}{2l} \frac{1}{r_0^2}. \tag{22}$$

Then we have:

$$\begin{aligned}
\Delta_t &= L(w_t) - L(w^*) \\
&\leq \frac{1}{\frac{1}{\Delta_0} + \frac{1}{2l} \frac{t}{r_0^2}} \\
&= \frac{1}{\frac{1}{L(w_0) - L(w^*)} + \frac{1}{2l} \frac{t}{\|w_0 - w^*\|_F^2}} \\
&= \frac{2l(L(w_0) - L(w^*)) \|w_0 - w^*\|_F^2}{2l \|w_0 - w^*\|_F^2 + t(L(w_0) - L(w^*))}.
\end{aligned} \tag{23}$$

Based on the property of L-smooth function, we have:

$$L(w_0) \leq L(w^*) + \langle L'(w^*), w_0 - w^* \rangle + \frac{l}{2} \|w_0 - w^*\|_F^2. \tag{24}$$

We have  $L(w_0) \geq L(w^*)$ , combine with Eq. 23 and Eq. 24, we have:

$$L(w_t) - L(w^*) \leq \frac{2l \|w_0 - w^*\|_F^2}{2l \frac{\|w_0 - w^*\|_F^2}{L(w_0) - L(w^*)} + t} \leq \frac{2l}{t} \|w_0 - w^*\|_F^2. \tag{25}$$

Thus the *Theorem 1* is proven.

## REFERENCES

- Yurii Nesterov. *Introductory lectures on convex optimization: A basic course*, volume 87. 2003.
- Shuaicheng Niu, Jiayang Wu, Yifan Zhang, Yong Guo, Peilin Zhao, Junzhou Huang, and Mingkui Tan. Disturbance-immune weight sharing for neural architecture search. *Neural Networks*, 144: 553–564, 2021.
